# Supplementary material
Source: PubMed Central journal article supplement (PMC4931183)
Supplement: EMBJ-35-1400-s002.pdf [file EMBJ-35-1400-s002.pdf]

## Expanded View Figures

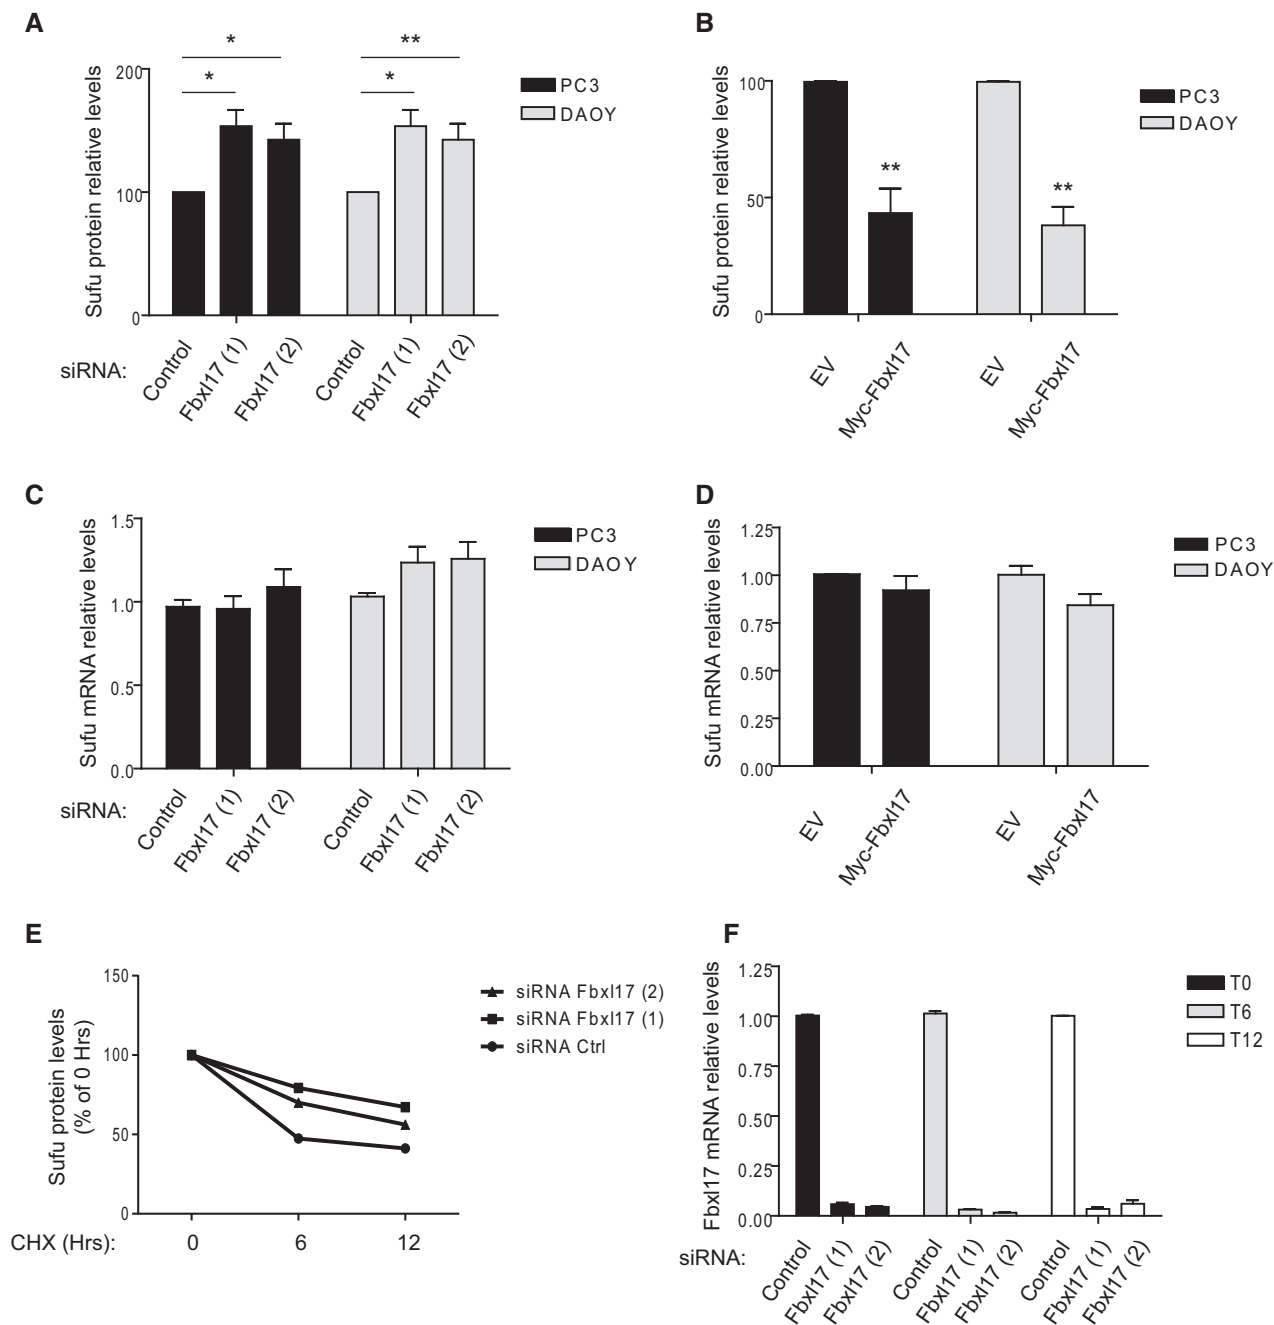

**Figure EV1. Fbx17 modulates Sufu protein levels, without affecting Sufu mRNA.**

A Relative abundance of Sufu protein levels in PC3 and DAOY cells reported in Fig 1E (mean  $\pm$  SEM from three independent experiments, \* $P$  < 0.05; \*\* $P$  < 0.005).  
 B Relative abundance of Sufu protein levels in PC3 and DAOY cells reported in Fig 1F (mean  $\pm$  SEM from three independent experiments, \*\* $P$  < 0.005).  
 C Sufu mRNA levels in PC3 and DAOY cells transfected with either a nontargeting siRNA (Control) or two siRNAs to Fbx17 (1) and (2) (mean  $\pm$  SEM).  
 D Sufu mRNA levels after the transfection of the indicated cell lines with an empty vector (EV) or a vector expressing Myc-Fbx17 (mean  $\pm$  SEM).  
 E Relative abundance of Sufu protein levels in HeLa cells reported Fig 1G. Data are normalized relative to 0 h (Hrs) of CHX (cycloheximide) treatment.  
 F Fbx17 mRNA levels in HeLa cells treated as in Fig 1G (mean  $\pm$  SEM).

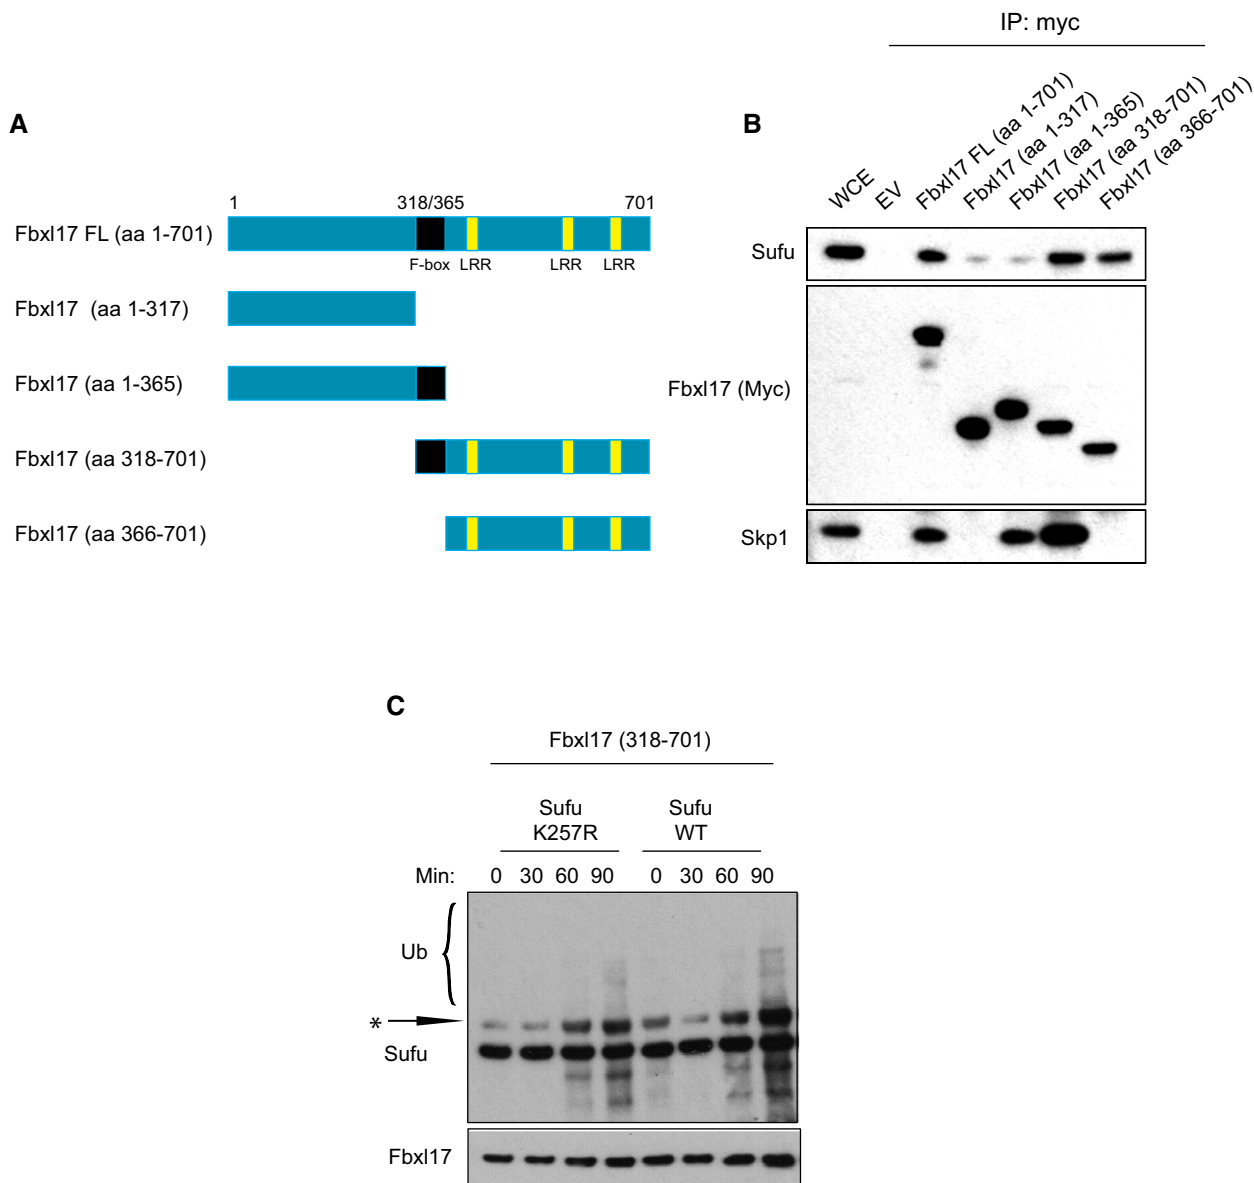

**Figure EV2. Sufu polyubiquitylation requires interaction with the carboxyl terminus of Fbx17.**

- A Scheme representing the mapping strategy to identify Fbx17 region required for Sufu recognition. The F-box is highlighted in black and the leucine-rich repeats (LRR) in yellow.
- B Detection of Sufu and Skp1 after immunoprecipitation of Myc-tagged Fbx17-truncated fragments, as indicated. An empty vector (EV) was used as a negative control. HEK293T cells were treated with MLN4924 (2 μM) for 5 h prior to collection.
- C *In vitro* ubiquitylation assay of Sufu WT and Sufu mutant K257R by Fbx17-truncated version 318–701. All proteins were synthesized *in vitro* using a T7-coupled reticulocyte lysate system and incubated for the indicated times. Arrow indicates a nonspecific band detected in reticulocyte lysates.

**Figure EV3. Systematic analysis of Sufu mode of interaction to Fbxl17.**

- A Schematic representation of Sufu-truncated mutants used to identify Sufu region required for Fbxl17 recognition. The black square delimitates the minimal binding region 350–425.
- B Detection of Myc-tagged Fbxl17 after immunoprecipitation of HA-Sufu-truncated fragments, as indicated in (A). An empty vector (EV) was used as a negative control. HEK293T cells were treated with MLN4924 (2  $\mu$ M) for 5 h prior to collection.
- C Detection of Myc-tagged Fbxl17 binding to HA-tagged Sufu deletion construct 350–425 in HEK293T cells. Transfection of an empty vector (EV) was used as a negative control for immunoprecipitation. Cells were treated with MLN4924 (2  $\mu$ M) for 5 h prior to collection.
- D Detection of Myc-tagged Fbxl17 binding to immunoprecipitated HA-tagged Sufu wild type (WT), Sufu S352F, or Sufu S352D. An empty vector (EV) was used as a negative control. HEK293T cells were treated with MLN4924 (2  $\mu$ M) for 5 h prior to collection.
- E Detection of Flag-tagged Gli1 and Myc-tagged Fbxl17 after immunoprecipitation of HA-tagged Sufu WT or Sufu S342/6A and S342/6D, as indicated. HEK293T cells were treated with MLN4924 (2  $\mu$ M) for 5 h prior to collection.
- F Detection of Myc-tagged Fbxl17 after immunoprecipitation of the indicated HA-Sufu point mutants in HEK293T cells. Cells were treated with MLN4924 (2  $\mu$ M) for 5 h prior to collection.

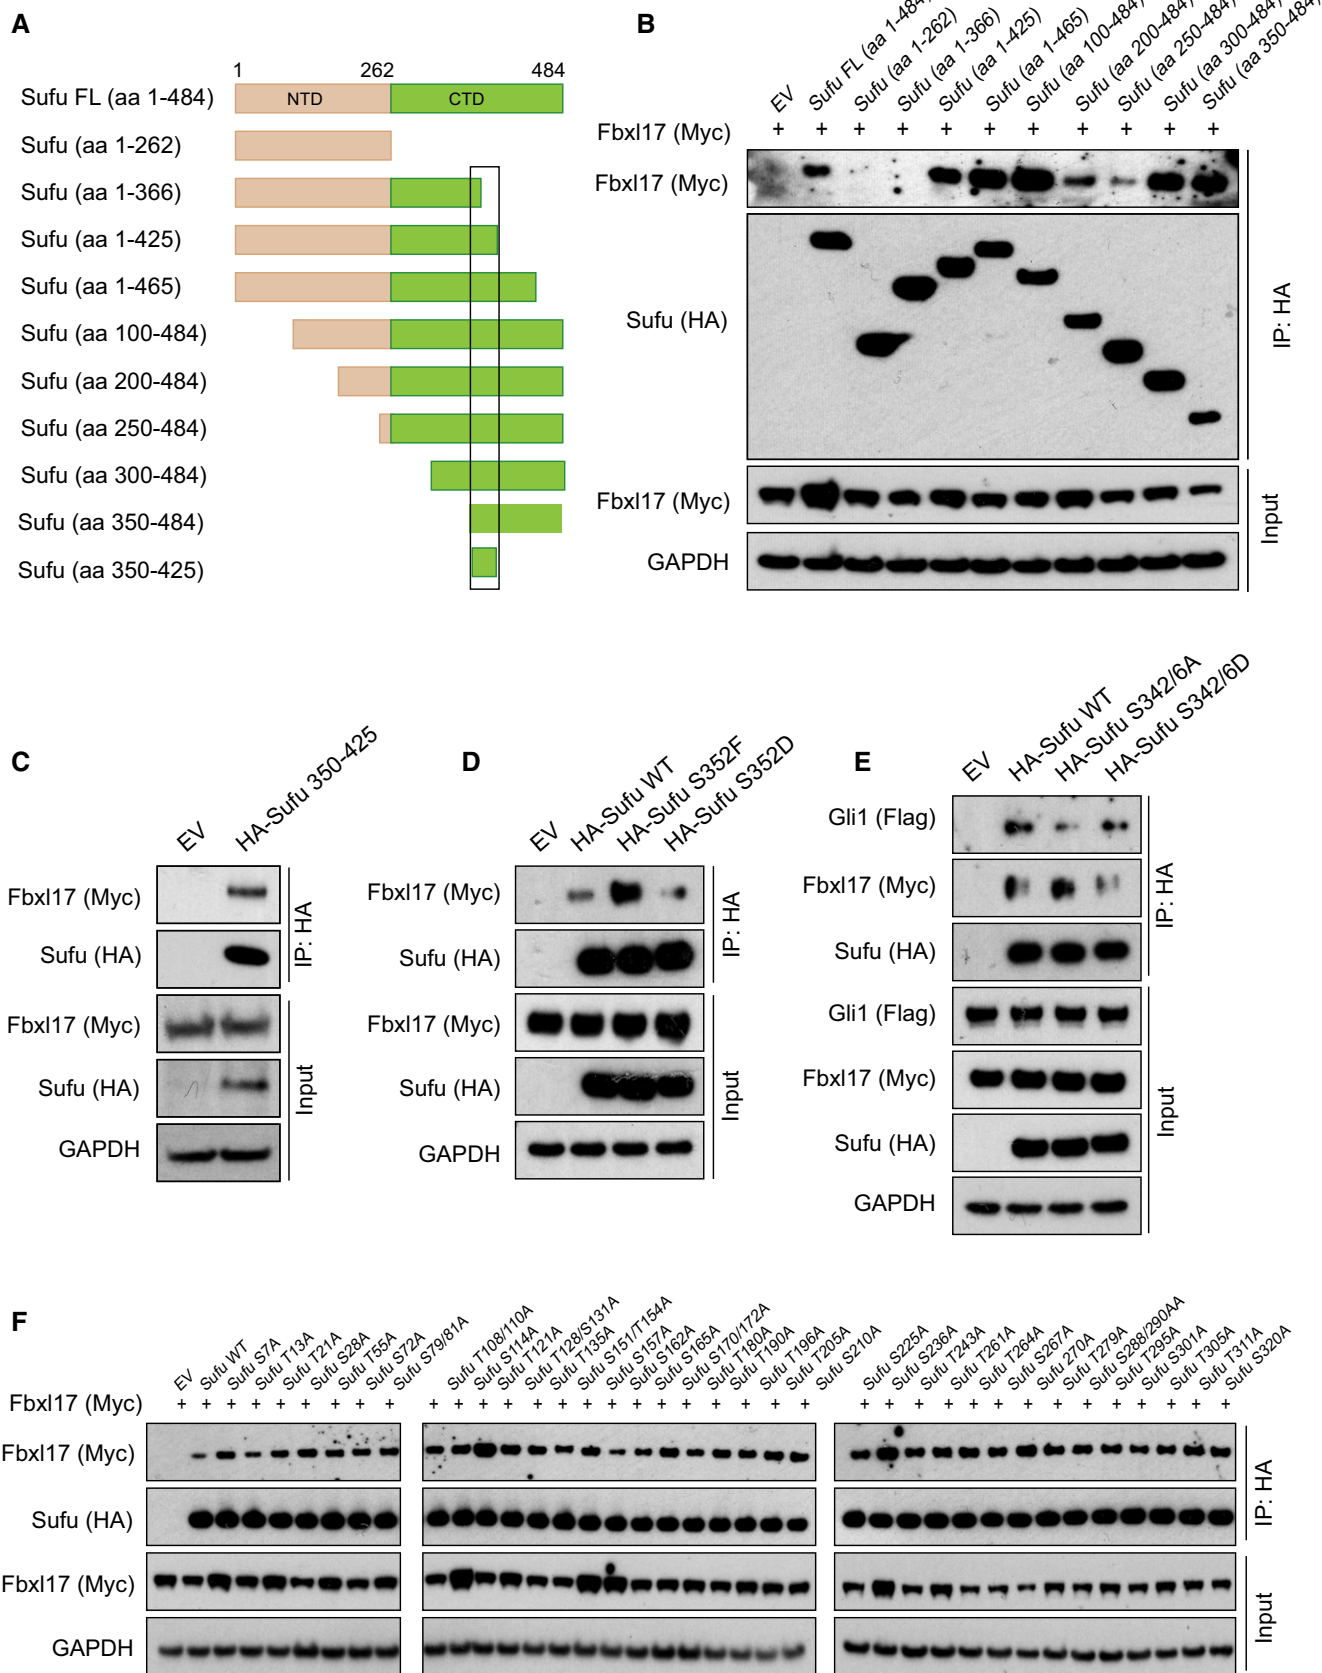

Figure EV3.

**Figure EV4. Fbxl17 regulates Hh signaling in DAOY medulloblastoma cells.**

- A Gli1 mRNA levels in DAOY cells upon the treatment with SAG or cyclopamine. DMSO was used as a control vehicle (mean  $\pm$  SEM from three independent experiments, **\*\*** $P < 0.005$ ; **\*\*\*** $P < 0.0005$ ).
- B Gli1 mRNA levels in DAOY cells transfected with nontargeting siRNA (Control) or siRNAs against Fbxl17 (2) and treated with DMSO (mean  $\pm$  SEM).
- C Gli1 mRNA levels in DAOY cells transfected as in (B) and treated with SAG (mean  $\pm$  SEM from three independent experiments, **\*** $P < 0.05$ ).
- D Gli1 mRNA levels in DAOY cells transfected as in (B) and treated with cyclopamine (mean  $\pm$  SEM).
- E Gli1 mRNA levels in DAOY cells treated with control medium (–) or medium containing SHH ligand (+) (mean  $\pm$  SEM from three independent experiments, **\*\*** $P < 0.005$ ).
- F Detection of Sufu protein levels in DAOY in the presence of a nontargeting siRNA (Control) or two siRNAs to Fbxl17 (1) and (2), after the treatment with control medium (–) or medium containing SHH (Sonic Hedgehog) ligand (+).
- G Relative abundance of Sufu protein levels detected in (F) (mean  $\pm$  SEM from three independent experiments, **\*\*** $P < 0.005$ ; **\*\*\*** $P < 0.05$ ).
- H Fbxl17 mRNA levels in DAOY cells upon the treatment with DMSO, SAG, or cyclopamine (mean  $\pm$  SEM).
- I Fbxl17 mRNA levels in DAOY cells after the treatment with control medium (–) or medium containing SHH ligand (+) (mean  $\pm$  SEM).

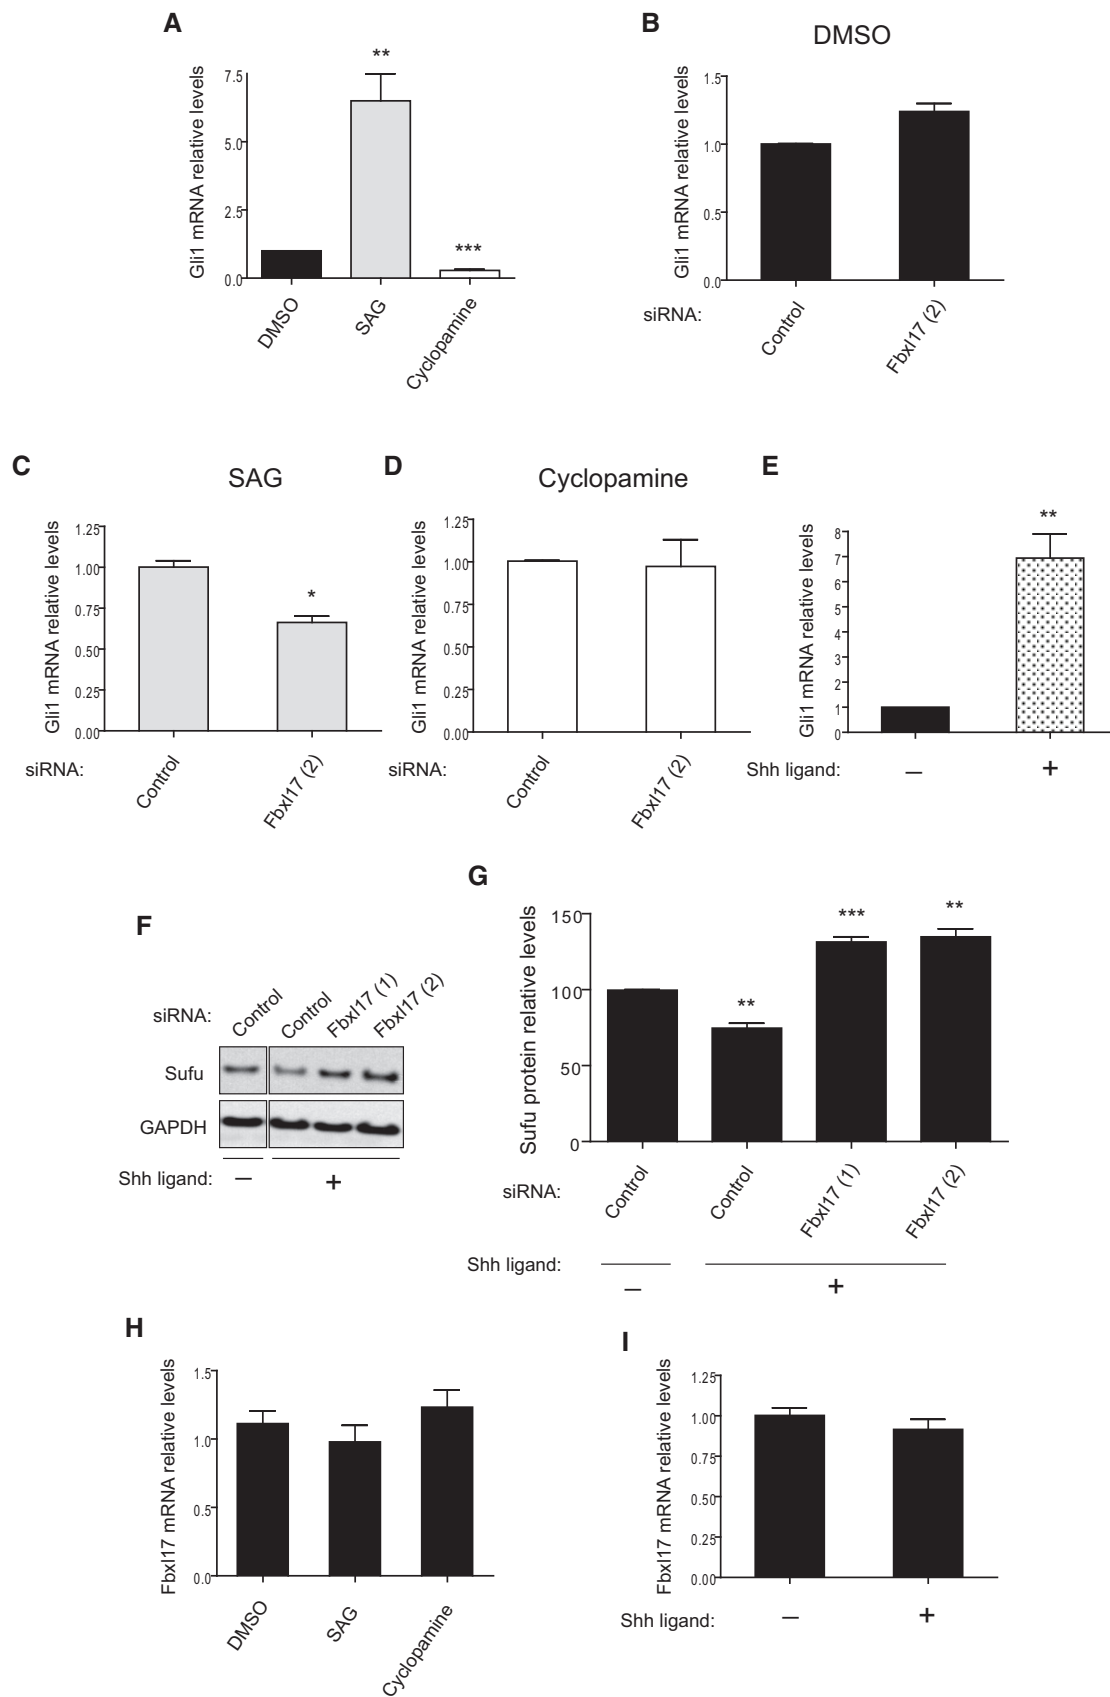

Figure EV4.

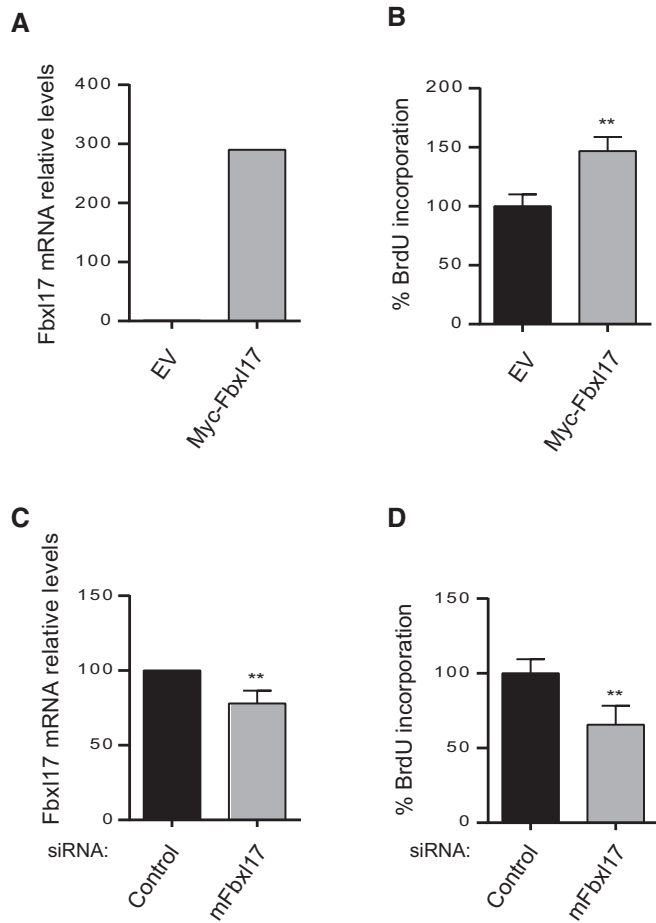

**Figure EV5. Fbxl17 regulates the proliferation of granule cell progenitors (GCPs).**

- A Fbxl17 mRNA levels in GCPs after transfection with an empty vector (pCDNA) or a vector expressing Myc-Fbxl17 (Fbxl17) (mean  $\pm$  SEM from three independent experiments, \*\* $P < 0.005$ ).
- B Cell proliferation of GCPs upon Fbxl17 overexpression (mean  $\pm$  SEM from three independent experiments, \*\* $P < 0.005$ ).
- C Fbxl17 mRNA levels in GCPs transfected with either a nontargeting siRNA (Control) or siRNAs to Fbxl17 (mean  $\pm$  SEM from three independent experiments, \*\* $P < 0.005$ ).
- D Cell proliferation of GCPs upon Fbxl17 depletion (mean  $\pm$  SEM from four independent experiments, \*\* $P < 0.005$ ).

Source data are available online for this figure.
