# Supplementary material
Source: PubMed Central journal article supplement (PMC4931183)
Supplement: EMBJ-35-1400-s004.pdf [file EMBJ-35-1400-s004.pdf]

۲۳۹

۲۳۹

۲۳۹

۰۰

۲۳۹

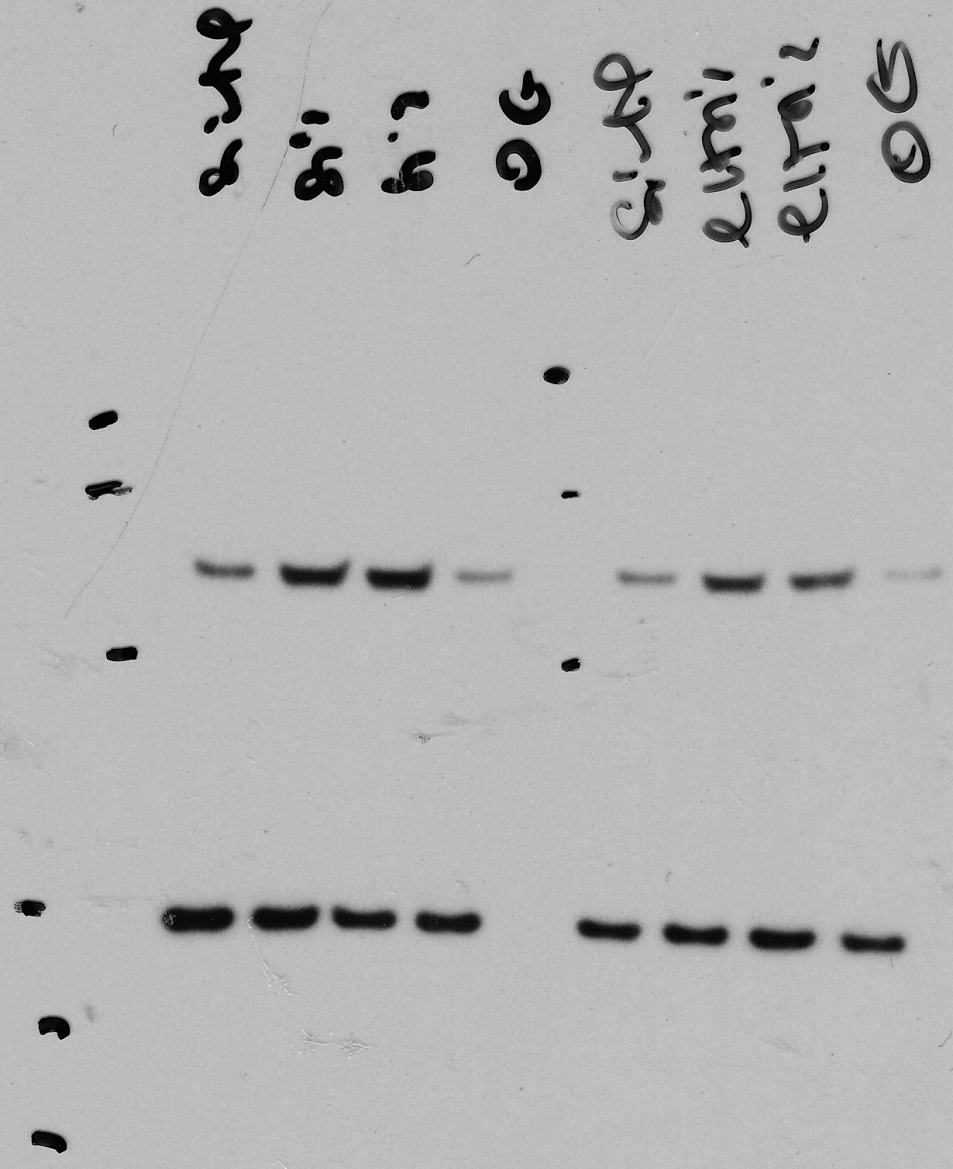

024
